# Supplementary material
Source: Springer Nature journal article supplement (https://www.springermedizin.de/resource/supplementary/12990_2009_204_MOESM2_ESM.pdf/9612784)

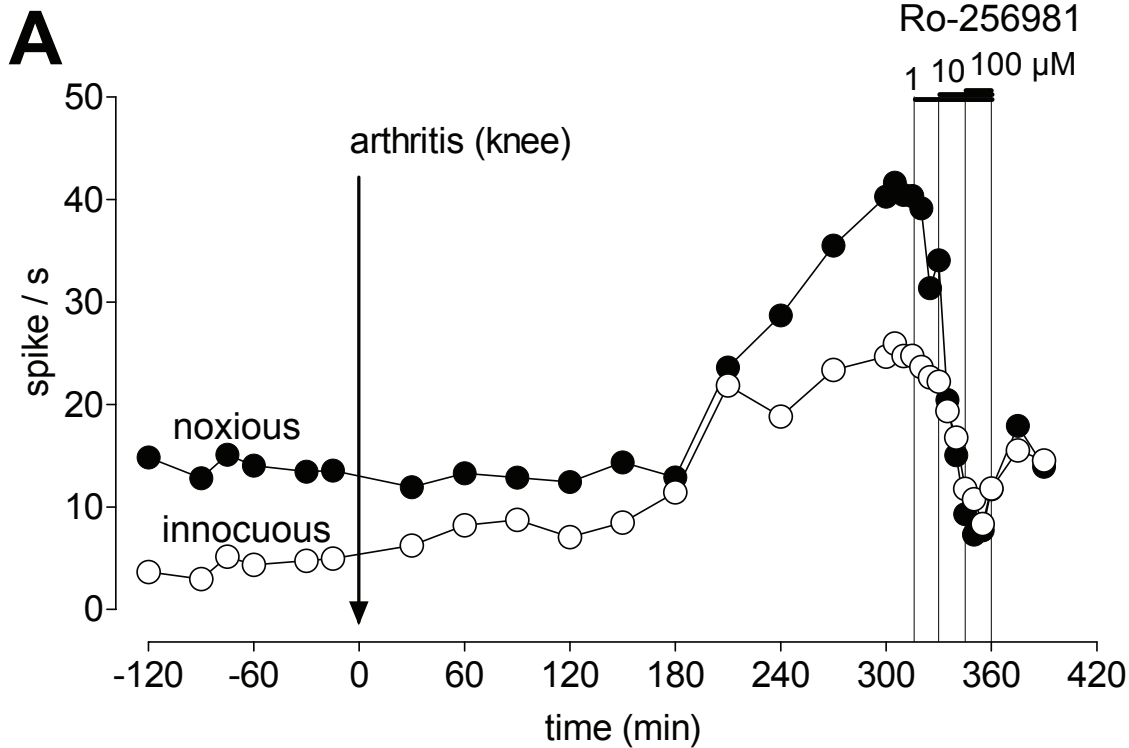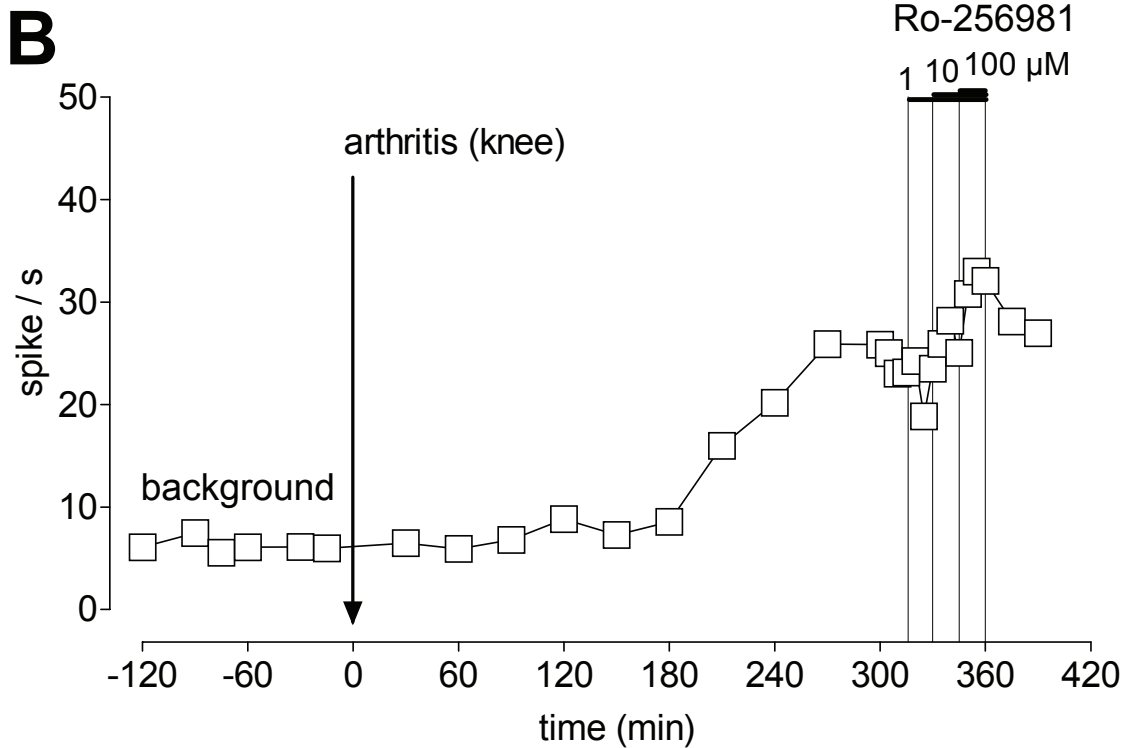

Supplement: MOESM2 [file 9612784]
